# Supplementary material for: 3-Mercaptopyruvate sulfur transferase is a protein persulfidase
Source: PubMed Central journal article supplement (PMC10060159; doi:10.1038/s41589-022-01244-8), 2023-02-02
Supplement: 41589_2022_1244_MOESM1_ESM.pdf [file 41589_2022_1244_MOESM1_ESM.pdf]

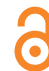

---

# 3-Mercaptopyruvate sulfur transferase is a protein persulfidase

---

In the format provided by the authors and unedited

---

**Supplementary Table 1: Reagents**

| <b>Reagent</b>                           | <b>Source</b>            | <b>Identifier</b> |
|------------------------------------------|--------------------------|-------------------|
| NEBuilder HiFi DNA Assembly Master Mix   | New England Biolabs      | E2621             |
| Quikchange Site-Directed Mutagenesis Kit | Agilent                  | 200519            |
| Dithiothreitol                           | Panreac AppliChem        | A2948             |
| Zeba™ Spin Desalting Columns             | Thermo Scientific        | 89882, 87766      |
| Sodium mercaptopyruvate dihydrate        | Sigma-Aldrich            | 90374             |
| 3-mercaptoplactic acid                   | Santa Cruz Biotechnology | sc-482537         |
| L-cysteine hydrochloride monohydrate     | Sigma-Aldrich            | C7880             |
| Sodium thiosulfate                       | Sigma-Aldrich            | 72049             |
| Sodium sulfide                           | Sigma-Aldrich            | 407410            |
| Potassium cyanide                        | Sigma-Aldrich            | 60178             |
| Potassium thiocyanate                    | Sigma-Aldrich            | P2713             |
| Sodium sulfite                           | Sigma-Aldrich            | S0505             |
| Glutathione, reduced                     | Sigma-Aldrich            | G6529             |
| Beta-mercaptoethanol                     | Sigma-Aldrich            | M3148             |
| Bovine serum albumin, fatty acid free    | Sigma-Aldrich            | A8806             |
| D-cysteine hydrochloride monohydrate     | Sigma-Aldrich            | C8005             |
| D-alanine                                | Sigma-Aldrich            | A7377             |
| Monobromobimane                          | Sigma-Aldrich            | B4380             |
| 4-chloro-7-nitrobenzofurazan             | Sigma-Aldrich            | 163260            |
| DAz-2                                    | Cayman Chemicals         | 13382             |
| Cyanine5 alkyne                          | Lumiprobe                | B30B0             |
| Copper(II)-TBTA complex                  | Lumiprobe                | 21050             |
| Neocuproine                              | Sigma-Aldrich            | N1501             |
| IGEPAL                                   | Sigma-Aldrich            | I3021             |
| Iodoacetamide                            | Sigma-Aldrich            | I5161             |
| Trifluoroacetic acid                     | Biosolve                 | 202341            |
| Acetonitrile                             | Carl-Roth                | 7330.1            |

|                                     |               |          |
|-------------------------------------|---------------|----------|
| Triethylammonium bicarbonate buffer | Sigma-Aldrich | T7408    |
| Ni <sup>2+</sup> -Sephacrose beads  | Cytiva        | 17526801 |
| PreScission Protease                | Cytiva        | 27084301 |
| GST-sepharose                       | Cytiva        | 17527901 |
| Streptavidin (SA) sepharose beads   | Cytiva        | 17511301 |

**Supplementary Table 2: Plasmids**

| Plasmid                       | Reference |
|-------------------------------|-----------|
| pQE60-roGFP2-His              | 1         |
| pETHisSUMO-Tum1-roGFP2        | This work |
| pETHisSUMO-Tum1(C259S)-roGFP2 | This work |
| pETHisSUMO-Tum1               | This work |
| pETHisSUMO-Tum1(C259S)        | This work |
| pET-SBP-HisSUMO-Tum1          | This work |
| p415TEF-roGFP2                | 2         |
| p415TEF-Tum1-roGFP2           | This work |
| p415TEF-Tum1(C259S)roGFP2     | This work |
| p415TEF-Su9roGFP2             | This work |
| p415TEF-Su9Tum1-roGFP2        | This work |
| p415TEF-Su9Tum1(C259S)-roGFP2 | This work |
| p416TEF-Su9DAAO               | This work |
| pLPCx roGFP2                  | This work |
| pLPCx MPST-roGFP2             | This work |
| pLPCx MPST(C248S)-roGFP2      | This work |

**Supplementary Table 3: Primers**

| Name                            | Sequence                                                                                                                                   | Purpose                                                                                                                        |
|---------------------------------|--------------------------------------------------------------------------------------------------------------------------------------------|--------------------------------------------------------------------------------------------------------------------------------|
| p415TEF(NcoI)-Tum1              | AAGTTTTCTAGAGGATCCACAT<br>GCCATTATTTGATCTTATTTTC                                                                                           | Amplify Tum1 to assemble with p415TEF(NcoI digested) and linker-roGFP2                                                         |
| linker.roGFP2-Tum1              | CACCACCTGAACCACCATCTCT<br>GTTTTCAAGCAATC                                                                                                   | Amplify Tum1 to assemble with p415TEF(NcoI digested) and linker-roGFP2                                                         |
| Tum1-linker.roGFP2              | AAACAGAGATGGTGGTTCAGG<br>TGGTGGTGGTTCAGGTGGTGG<br>TGGTTCAGGTGGAGGAGGATC<br>AGGAGGAGGAGGATCAGGAG<br>GAGGAGGATCAGGAGGAGCTA<br>GCGAATTCTCAAAG | Amplify linker-roGFP2 to assemble with Tum1 and p415TEF (HindIII digested)                                                     |
| p415TEF(HindIII)-linker.roGFP2  | TGACTCGAGGTCGACGGTATC<br>GATATTATTTATACAATTCATCC<br>ATACCC                                                                                 | Amplify linker-roGFP2 to assemble with Tum1 and p415TEF (HindIII digested)                                                     |
| Tum1_C259S_fw                   | CCAACTATTTGCTCTTCTGGAA<br>CTGGCGTTTCAGG                                                                                                    | Site-directed mutagenesis of Tum1 catalytic Cys 259 to serine                                                                  |
| Tum1_C259S_rev                  | CCTGAAACGCCAGTTCAGAA<br>GAGCAAATAGTTGG                                                                                                     | Site-directed mutagenesis of Tum1 catalytic Cys 259 to serine                                                                  |
| p415TEFSu9(BamHI)-Tum1-roGFP2   | GAAGCGCGCCTACTCTTCCGG<br>ATCCCCATTATTTGATCTTATTT<br>CTCC                                                                                   | Amplify Tum1-roGFP2 to assemble with p415TEF + Su9 signal peptide for mitochondrial localization (BamHI/HindIII digested)      |
| p415TEFSu9(HindIII)-Tum1-roGFP2 | CGAGGTCGACGGTATCGATAT<br>TATTTATACAATTCATCCATACC                                                                                           | Amplify Tum1-roGFP2 to assemble with p415TEF + Su9 signal peptide for mitochondrial localization (BamHI/HindIII digested)      |
| p416TEFSu9(BamHI)-Su9           | TAAGTTTTCTAGAACTAGTGGA<br>TCCATGGCCTCCACTCGTGTC                                                                                            | Amplify F <sub>0</sub> -ATPase (Su9) from <i>Neurospora crassa</i> to assemble with p416TEF (BamHI/HindIII digested) and DAAO. |
| DAAO-Su9                        | TCTGGCTGTGGGATCCGGAAG<br>AGTAGGC                                                                                                           | Amplify F <sub>0</sub> -ATPase (Su9) from <i>Neurospora crassa</i> to assemble with p416TEF (BamHI/HindIII digested) and DAAO. |

|                           |                                                       |                                                                                                                         |
|---------------------------|-------------------------------------------------------|-------------------------------------------------------------------------------------------------------------------------|
| Su9-DAAO                  | TTCCGGATCCCACAGCCAGAA<br>GAGGGTG                      | Amplify DAAO to assemble with p416TEF (BamHI/HindIII digested) and F <sub>0</sub> -ATPase (Su9) from <i>N. crassa</i> . |
| p416TEFSu9(HindIII)-DAAO  | CGAGGTCGACGGTATCGATAA<br>GCTTTTAGCTCTCCCTAGCTGC       | Amplify DAAO to assemble with p416TEF (BamHI/HindIII digested) and F <sub>0</sub> -ATPase (Su9) from <i>N. crassa</i> . |
| pETHisSUMO_fw             | AGACAAGCTTAGGTATTTATTC<br>G                           | Amplify linearized pETHisSUMO                                                                                           |
| pETHisSUMO-rv             | TGGACCCTGGAACAGAAC                                    | Amplify linearized pETHisSUMO                                                                                           |
| pETHisSUMO-Tum1-roGFP2-fw | AAGTTCTGTTCCAGGGTCCAAT<br>GCCATTATTTGATCTTATTTTC      | Amplify Tum1-roGFP2 to assemble with linearized pETHisSUMO vector                                                       |
| pETHisSUMO-Tum1-roGFP2-rv | ATAAATACCTAAGCTTGTCTTT<br>ATTTATACAATTCATCCATACC<br>C | Amplify Tum1-roGFP2 to assemble with linearized pETHisSUMO vector                                                       |
| roGFP2_C148S_fw           | GGAGTACAACACTACAACAGCCA<br>CAACGTCTATATC              | Mutagenesis cys148 from roGFP2-His expressed in pQE60 vector to serine                                                  |
| roGFP2_C148S_rv           | GATATAGACGTTGTGGCTGTT<br>GTAGTTGTACTCC                | Mutagenesis cys148 from roGFP2-His expressed in pQE60 vector to serine                                                  |
| roGFP2_C205S_fw           | ACCACTACCTGAGCACCAGCT<br>CCGCCCTGAGCAAA               | Mutagenesis cys205 from roGFP2-His expressed in pQE60 vector to serine                                                  |
| roGFP2_C205S_rv           | TTTGCTCAGGGCGGAGCTGGT<br>GCTCAGGTAGTGGT               | Mutagenesis cys205 from roGFP2-His expressed in pQE60 vector to serine                                                  |
| pETHisSUMO-Tum1_fw        | AAGTTCTGTTCCAGGGTCCAAT<br>GCCATTATTTGATCTTATTTTC      | Amplify Tum1 (no roGFP2) to anneal to linearized pETHisSUMO                                                             |
| pETHisSUMO-Tum1_rv        | ATAAATACCTAAGCTTGTCTTT<br>AATCTCTGTTTTTCAGCAATC       | Amplify Tum1 (no roGFP2) to anneal to linearized pETHisSUMO                                                             |
| MPST_C248S_fw             | CTGGTTGCTACAAGCGGTTCA<br>GGCG                         | Mutagenesis cys248 from human MPST to serine                                                                            |
| MPST_C248S_rv             | CGCCTGAACCGCTTGTAGCAA<br>CCAG                         | Mutagenesis cys248 from human MPST to serine                                                                            |

### **Supplementary references**

1. Gutscher, M. *et al.* Real-time imaging of the intracellular glutathione redox potential. *Nat Methods* 5, 553–559 (2008)
2. Morgan, B. *et al.* Multiple glutathione disulfide removal pathways mediate cytosolic redox homeostasis. *Nat Chem Biol* 9, 119–125 (2013)
